# Supplementary material for: Protective Effect of the HLA-DRB1*13:02 Allele in Japanese Rheumatoid Arthritis Patients
Source: PubMed Central journal article supplement (PMC4049831; doi:10.1371/journal.pone.0099453), 2014-06-09
Supplement: pone.0099453.s003.pdf [file pone.0099453.s003.pdf]

Supplementary Table S3. Age at onset of *HLA-DRB1* allele carrier or non-carrier in the RA patients.

|               | carrier |              | non-carrier |              | <i>P</i> |
|---------------|---------|--------------|-------------|--------------|----------|
|               | n       | age at onset | n           | age at onset |          |
| SE            | 719     | 49.2 (14.0)  | 280         | 49.7 (15.3)  | 0.5208   |
| <i>*04:05</i> | 510     | 48.2 (13.8)  | 489         | 50.5 (14.9)  | 0.0070   |
| <i>*13:02</i> | 83      | 53.8 (14.0)  | 916         | 48.9 (14.4)  | 0.0027   |
| <i>*04:01</i> | 67      | 48.6 (13.2)  | 932         | 49.4 (14.5)  | 0.6372   |
| <i>*09:01</i> | 281     | 48.6 (14.7)  | 718         | 49.6 (14.2)  | 0.3725   |
| <i>*01:01</i> | 143     | 52.9 (13.3)  | 856         | 48.7 (14.5)  | 0.0021   |

RA: rheumatoid arthritis. Average values of each group are shown.

Standard deviations are shown in parenthesis. Differences were tested by Mann-Whitney's U test.
